# Supplementary material for: Dietary Intakes and Cardiovascular Health of Healthy Adults in Short-, Medium-, and Long-Term Whole-Food Plant-Based Lifestyle Program
Source: PubMed Central journal article supplement (PMC7019440; doi:10.3390/nu12010055), 2019-12-24
Supplement: nutrients-12-00055-s001.pdf [file nutrients-12-00055-s001.pdf]

**Table S1.** Current demographic and other characteristics of study participants.

| Parameter                         | Group 1 (n = 51) |               | Group 2 (n = 56) |               | Group 3 (n = 44) |               |
|-----------------------------------|------------------|---------------|------------------|---------------|------------------|---------------|
|                                   | Female (n = 35)  | Male (n = 16) | Female (n = 43)  | Male (n = 13) | Female (n = 31)  | Male (n = 13) |
| <b>Partner status (n (%))</b>     |                  |               |                  |               |                  |               |
| Married                           | 14 (40)          | 4 (25.0)      | 23 (53.5)        | 2 (15.4)      | 13 (41.9)        | 3 (23.1)      |
| Extramarital                      | 10 (28.6)        | 6 (37.5)      | 23 (53.5)        | 9 (69.2)      | 12 (38.7)        | 7 (53.8)      |
| Single                            | 10 (28.6)        | 6 (37.5)      | 10 (23.3)        | 2 (15.4)      | 5 (16.1)         | 3 (23.1)      |
| Widowed                           | 1 (2.9)          | 0             | 0                | 0             | 1 (3.2)          | 0             |
| <b>Living regions (n (%))</b>     |                  |               |                  |               |                  |               |
| Capital city (Central)            | 17 (48.6)        | 9 (56.2)      | 9 (20.9)         | 4 (30.8)      | 11 (35.5)        | 7 (53.8)      |
| Dolenjska (South East)            | 8 (22.9)         | 4 (25.0)      | 23 (53.5)        | 5 (38.5)      | 10 (32.3)        | 1 (7.7)       |
| Gorenjska (North/North West)      | 3 (8.6)          | 1 (6.2)       | 4 (9.3)          | 2 (15.4)      | 3 (9.7)          | 3 (23.1)      |
| Notranjska (Central/South West)   | 1 (2.9)          | 0             | 0                | 0             | 1 (3.2)          | 1 (7.7)       |
| Prekmurje (North East)            | 1 (2.9)          | 0             | 0                | 0             | 0                | 0             |
| Štajerska (East)                  | 5 (14.3)         | 2 (12.5)      | 7 (16.3)         | 2 (15.4)      | 6 (19.4)         | 1 (7.7)       |
| <b>Living environment (n (%))</b> |                  |               |                  |               |                  |               |
| City                              | 7 (20)           | 7 (43.8)      | 10 (23.3)        | 3 (23.1)      | 8 (25.8)         | 6 (46.2)      |
| Suburban                          | 9 (25.7)         | 4 (25.0)      | 16 (37.2)        | 3 (23.1)      | 11 (35.5)        | 5 (38.5)      |
| Rural                             | 19 (54.3)        | 5 (31.2)      | 17 (39.5)        | 7 (53.8)      | 12 (38.7)        | 2 (15.4)      |
| <b>Education (n (%))</b>          |                  |               |                  |               |                  |               |
| Primary School/High School        | 14 (40.0)        | 11 (68.7)     | 13 (30.2)        | 4 (30.8)      | 10 (32.3)        | 5 (38.5)      |
| College                           | 4 (11.4)         | 0             | 5 (11.6)         | 4 (30.8)      | 2 (6.5)          | 1 (7.7)       |
| Bachelor/University degree        | 15 (42.8)        | 5 (31.2)      | 23 (53.5)        | 5 (38.5)      | 18 (58.0)        | 6 (46.2)      |
| Masters/PhD degree                | 1 (2.9)          | 0             | 2 (4.7)          | 0             | 1 (3.2)          | 1 (7.7)       |
| N/A (did not disclose)            | 1 (2.9)          | 0             | 0                | 0             | 0                | 0             |
| <b>Employment status (n (%))</b>  |                  |               |                  |               |                  |               |
| Employed/help in family business  | 23 (65.7)        | 7 (43.8)      | 31 (74.4)        | 8 (61.5)      | 16 (51.6)        | 8 (61.5)      |
| Self-employed/contract            | 3 (8.6)          | 2 (12.5)      | 5 (11.6)         | 4 (30.8)      | 9 (29.0)         | 4 (30.8)      |
| Retired                           | 1 (2.9)          | 1 (6.2)       | 2 (4.6)          | 1 (7.7)       | 2 (6.5)          | 0             |
| High-school/student               | 7 (20.0)         | 5 (31.2)      | 1 (2.3)          | 0             | 2 (6.5)          | 1 (7.7)       |
| Unemployed                        | 1 (2.9)          | 1 (6.2)       | 3 (7.0)          | 0             | 2 (6.5)          | 0             |
| <b>Economic status (n (%))</b>    |                  |               |                  |               |                  |               |
| Low income/financially challenged | 3 (8.6)          | 1 (6.2)       | 2 (4.7)          | 1 (7.7)       | 0                | 1 (7.7)       |
| Average/mildly above average      | 31 (88.5)        | 14 (87.5)     | 40 (93.0)        | 10 (76.9)     | 30 (96.8)        | 12 (92.3)     |

|                                                          | Group 1 (n = 51) |               | Group 2 (n = 56) |               | Group 3 (n = 44) |               |
|----------------------------------------------------------|------------------|---------------|------------------|---------------|------------------|---------------|
| Parameter                                                | Female (n = 35)  | Male (n = 16) | Female (n = 43)  | Male (n = 13) | Female (n = 31)  | Male (n = 13) |
| Above average                                            | 1 (2.9)          | 1 (6.2)       | 1 (2.3)          | 2 (15.4)      | 1 (3.2)          | 0             |
| <b>Income (€ (%))</b>                                    |                  |               |                  |               |                  |               |
| Up to 700                                                | 6 (17.1)         | 1 (6.7)       | 2 (4.6)          | 0             | 0                | 0             |
| 701–1100                                                 | 4 (11.5)         | 3 (20.0)      | 3 (7.0)          | 0             | 2 (6.4)          | 1 (7.7)       |
| 1101–1500                                                | 5 (14.3)         | 1 (6.7)       | 7 (16.3)         | 1 (7.7)       | 3 (9.7)          | 2 (15.4)      |
| 1501–1900                                                | 11 (31.4)        | 2 (13.3)      | 8 (18.6)         | 4 (30.8)      | 2 (6.4)          | 4 (30.8)      |
| From 1901                                                | 9 (25.7)         | 8 (53.3)      | 23 (53.5)        | 8 (61.5)      | 23 (74.2)        | 6 (46.1)      |
| N/A (did not disclose)                                   | 0                | 0             | 0                | 0             | 1 (3.2)          | 0             |
| <b>Smoking (n (%))</b>                                   |                  |               |                  |               |                  |               |
| Current                                                  | 4 (11.4)         | 3 (18.8)      | 7 (16.7)         | 2 (15.4)      | 8 (25.8)         | 2 (15.4)      |
| Former                                                   | 3 (8.6)          | 1 (6.2)       | 2 (4.8)          | 0             | 1 (3.2)          | 0             |
| Never                                                    | 28 (80.0)        | 12 (75.0)     | 33 (78.6)        | 11 (84.6)     | 22 (71.0)        | 11 (84.6)     |
| <b>Menstrual status (n (%))</b>                          |                  |               |                  |               |                  |               |
| Menstruation                                             | 29 (82.9)        | -             | 32 (74.4)        | -             | 23 (74.2)        | -             |
| Perimenopause                                            | 2 (5.7)          | -             | 0                | -             | 2 (6.5)          | -             |
| Menopause                                                | 4 (11.4)         | -             | 11 (25.6)        | -             | 6 (19.4)         | -             |
| <b>Medications (n)</b>                                   |                  |               |                  |               |                  |               |
| Thyroid medication                                       | 1                | 0             | 1                | 0             | 0                | 0             |
| Birth-control pills                                      | 1                | 0             | 1                | 0             | 0                | 0             |
| Vitamin D <sub>3</sub> prescribed by doctor <sup>‡</sup> | 2                | 1             | 1                | 0             | 1                | 1             |
| Nausea                                                   | 0                | 0             | 1                | 0             | 0                | 0             |
| Others                                                   | 1                | 0             | 1                | 0             | 0                | 0             |

Data are means (standard deviation). <sup>‡</sup>Vitamin D<sub>3</sub> here represents only medically prescribed vitamin D.

**Table S2.** Dietary intake of energy and macronutrients of all participants in WFPB lifestyle program (0.5-10 years) according to genders comparison.

| <b>Whole sample (n = 151)</b>   |                  |               |                  |
|---------------------------------|------------------|---------------|------------------|
|                                 | Female (n = 109) | Male (n = 42) | <i>p</i> -Values |
| <b>Macronutrients (per day)</b> |                  |               | F vs. M          |
| Energy intake (kcal)            | 1841 (539)       | 2618 (726)    | <0.001           |
| Carbohydrates (g)               | 266 (87)         | 370 (98)      | <0.001           |
| (% E)                           | 58 (5)           | 57 (6)        | 0.354            |
| Total sugars (g)                | 80 (35)          | 101 (37)      | <0.001           |
| (% E)                           | 17 (4)           | 16 (4)        | 0.028            |
| Free sugars (g)                 | 22 (18)          | 24 (11)       | 0.007            |
| (% E)                           | 5 (3)            | 4 (2)         | 0.177            |
| Starches (g)                    | 82 (45)          | 128 (52)      | <0.001           |
| (% E)                           | 18 (7)           | 19 (6)        | 0.110            |
| Dietary fibre (g)               | 64 (16)          | 85 (23)       | <0.001           |
| (% E)                           | 7.1 (1)          | 6.6 (1)       | 0.015            |
| Fat (g)                         | 40 (16)          | 63 (31)       | <0.001           |
| (% E)                           | 20 (5)           | 21 (6)        | 0.252            |
| SFA (g)                         | 6 (3)            | 10 (4)        | <0.001           |
| (% E)                           | 3 (1)            | 3 (2)         | 0.051            |
| MUFA (g)                        | 11 (5)           | 18 (10)       | <0.001           |
| (% E)                           | 5 (2)            | 6 (2)         | 0.125            |
| PUFA (g)                        | 18 (7)           | 28 (15)       | <0.001           |
| (% E)                           | 9 (3)            | 9 (3)         | 0.337            |
| Linoleic acid (g)               | 11 (6)           | 19 (11)       | <0.001           |
| Alpha-linolenic acid (g)        | 5 (3)            | 7 (4)         | 0.005            |
| EPA (mg)                        | 332 (233)        | 338 (183)     | 0.630            |
| DHA (mg)                        | 226 (163)        | 245 (156)     | 0.582            |
| ARA (mg)                        | 2 (7)            | 3 (9)         | 0.819            |
| Cholesterol (mg)                | 6 (18)           | 10 (18)       | 0.459            |
| Protein (g)                     | 70 (19)          | 100 (26)      | <0.001           |
| (% E)                           | 15 (2)           | 15 (3)        | 0.891            |
| (g/kg body mass)                | 1.1 (0.4)        | 1.3 (0.4)     | 0.063            |
| Water <sup>w</sup> (L)          | 3.9 (1.2)        | 4.2 (1.2)     | 0.063            |

Data are means (standard deviation). <sup>w</sup> Water from foods and beverages. A T-test was used to compare differences between genders.

**Table S3.** Dietary intake of selected vitamins, minerals, and trace minerals of all participants in WFPB lifestyle program (0.5-10 years) according to genders comparison.

| Micronutrients (per day)                 | Whole sample (n = 151) |               | p-Values          |
|------------------------------------------|------------------------|---------------|-------------------|
|                                          | Female (n = 109)       | Male (n = 42) |                   |
| <b>Vitamins</b>                          |                        |               |                   |
| Thiamine (mg)                            | 2.9 (1.4)              | 3.4 (1.0)     | F vs. M<br><0.001 |
| Riboflavin (mg)                          | 3.0 (1.8)              | 2.9 (1.6)     | 0.797             |
| Niacin (mg)                              | 30 (3)                 | 34 (10)       | 0.003             |
| Pantothenic acid (mg)                    | 11 (3)                 | 12 (3)        | 0.043             |
| Vitamin B <sub>6</sub> (pyridoxine) (mg) | 3.9 (1.3)              | 4.5 (1.1)     | 0.002             |
| Biotin (µg)                              | 100 (40)               | 110 (43)      | 0.138             |
| Folate (µg folate equivalent)            | 763 (211)              | 929 (285)     | <0.001            |
| Vitamin B <sub>12</sub> (µg)             | 247 (320)              | 337 (379)     | 0.056             |
| Vitamin C (mg)                           | 334 (164)              | 344 (146)     | 0.715             |
| Retinol equivalents <sup>re</sup> (mg)   | 3.6 (2.0)              | 4.6 (3.0)     | 0.012             |
| Vitamin D (µg)                           | 11 (11)                | 9 (7)         | 0.157             |
| Vitamin E (mg)                           | 28 (12)                | 31 (25)       | 0.881             |
| <b>Minerals</b>                          |                        |               |                   |
| Calcium (mg)                             | 1016 (292)             | 1251 (362)    | <0.001            |
| Magnesium (mg)                           | 839 (293)              | 1042 (328)    | <0.001            |
| Phosphorus (mg)                          | 1663 (411)             | 2233 (584)    | <0.001            |
| Potassium (mg)                           | 4554 (1278)            | 5915 (1577)   | <0.001            |
| Sodium (mg)                              | 1955 (933)             | 2270 (1052)   | 0.073             |
| Chloride (mg)                            | 3160 (1453)            | 3684 (1616)   | 0.037             |
| <b>Trace elements</b>                    |                        |               |                   |
| Iron (mg)                                | 35 (19)                | 40 (10)       | <0.001            |
| Copper (mg)                              | 3.8 (1.1)              | 4.9 (1.6)     | <0.001            |
| Iodine (µg)                              | 230 (75)               | 247 (71)      | 0.139             |
| Zinc (mg)                                | 19 (5)                 | 23 (6)        | <0.001            |
| Chrome (µg)                              | 80 (31)                | 77 (34)       | 0.520             |
| Molybdenum (µg)                          | 94 (63)                | 85 (59)       | 0.282             |
| Selenium (µg)                            | 112 (44)               | 128 (46)      | 0.028             |

Data are means (standard deviation). <sup>re</sup>Retinol equivalents = vitamin A + α-carotene (1 mg retinol equivalent = 12 mg α-carotene) + β-carotene (1 mg retinol equivalent = 6 mg β-carotene) + γ-carotene (1 mg retinol equivalent = 12 mg γ-carotene). A T-test was used to compare differences between genders.

**Table S4.** Cardiovascular health (lipids and BP) and safety marker status (serum UA and haemoglobin concentration) for all participants in WFPB lifestyle program (0.5-10 years) according to gender comparison.

| Parameter                   | Whole sample     |               | p-Value |
|-----------------------------|------------------|---------------|---------|
|                             | Female (n = 109) | Male (n = 42) |         |
| <b>Laboratory variables</b> |                  |               |         |
| S-cholesterol (mmol/L)      | 3.7 (0.8)        |               | 0.002   |
|                             | 3.8 (0.7)        | 3.4 (0.9)     |         |
| LDL-cholesterol (mmol/L)    | 2.0 (0.7)        |               | 0.451   |
|                             | 2.0 (0.6)        | 2.0 (0.7)     |         |
| HDL-cholesterol (mmol/L)    | 1.4 (0.4)        |               | <0.001  |
|                             | 1.5 (0.3)        | 1.1 (0.2)     |         |
| Triglycerides (mmol/L)      | 0.9 (0.4)        |               | 0.037   |
|                             | 0.8 (0.3)        | 1.0 (0.4)     |         |
| S-Uric Acid (µmol/L)        | 273 (68)         |               | <0.001  |
|                             | 245 (50)         | 346 (52)      |         |

|                              |          |          |        |
|------------------------------|----------|----------|--------|
| Haemoglobin (g/L)            | 141 (12) |          |        |
|                              | 137 (10) | 153 (9)  | <0.001 |
| <b>Blood pressure (mmHg)</b> |          |          |        |
| Systolic                     | 115 (11) |          |        |
|                              | 113 (11) | 120 (10) | <0.001 |
| Diastolic                    | 71 (9)   |          |        |
|                              | 71 (9)   | 72 (8)   | 0.143  |

Data are means (standard deviation). A T-test was used to compare differences between genders.
